# Supplementary material for: Evidence of non-Plasmodium falciparum malaria infection in Kédougou, Sénégal
Source: Springer Nature journal article supplement (doi:10.1186/s12936-016-1661-3), 2017-01-03

*P. falciparum* positivity by clinic in Kédougou, 2013-2014

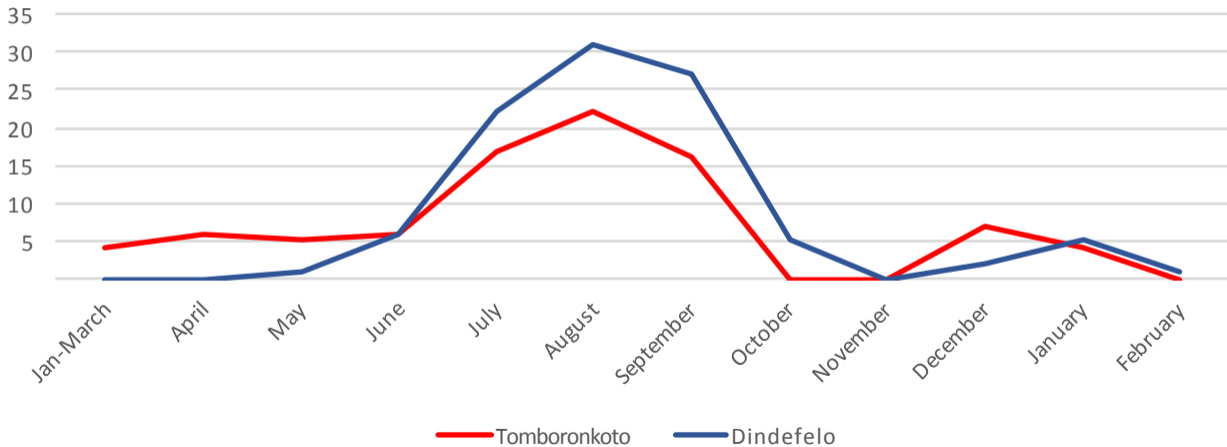

Supplement: MOESM2 [file 11977616]
